# Supplementary figures and images for: A comparison of the bioactivity and phytochemical profile of three different cultivars of globe amaranth: red, white, and pink
Source: Royal Society of Chemistry journal article supplement (doi:10.1039/c5fo01342a), 2015-12-08

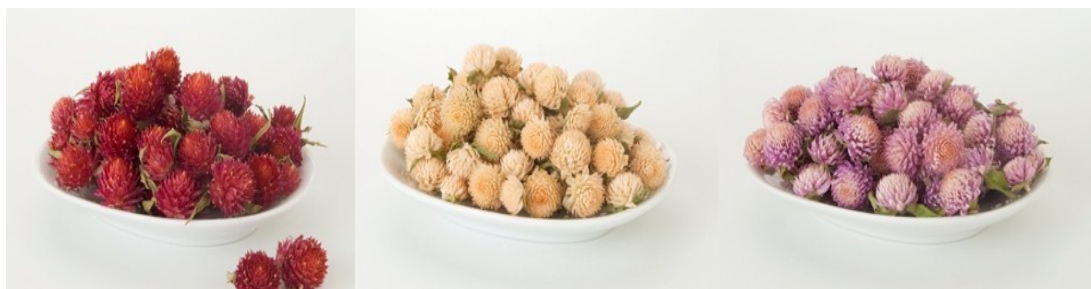

amaranth) studied in the present work and supplied by "Cantinho das Aromáticas".

Supplement: c5fo01342a1.pdf [file c5fo01342a1.pdf]
